# Supplementary material for: A Methodology for Preliminary Design and Evaluation of Hybrid-Parallel Multicopters with a Novel Configuration
Source: Research Square preprint supplement (doi:10.21203/rs.3.rs-7453834/v1), 2025-10-08
Supplement: Supplementary file 1 [file ed03335cd6e118291d398e8e.xlsx]

## Sheet: Sheet1
Number	UAV Model	MTOW (kg)	Flight Endurance (Hours)	Payload (kg)	Source
1	Foxtech THEA 140 Hybrid Pro	23	0.5	9.2	https://www.foxtechfpv.com/product/agriculture/THEA140-manual-en-190129.pdf?srsltid=AfmBOooD77H6cQLSd-98LFnx6f_zif4ho0P-1exZb0AcjuPCD_rDVbbO
2	Avartek Boxer Hybrid Drone	27	0.683333	8	https://avartek.fi/#features
3	HXF16	45	0.75	16	https://www.industry-drones.com/sale-36474071-5km-45min-multi-rotary-hybrid-drone-image-transmission-16l-pesticide-box-80hectare-h-agri-drones-hxf.html
4	HXF22	57	0.75	22	https://www.industry-drones.com/sale-36479893-4-axis-4-rotors-4l-gasoline-tank-hybrid-drone-uav-agricultural-spraying-pest-control-hxf22.html
5	Avartek Boxer Hybrid Drone	25	0.833333	6	https://avartek.fi/#features
6	Skyfront Perimeter 8+	26	1	10	Skyfront
7	Harris Aerial Carrier H6 Hybrid	25	1	6	https://harrisaerial.com/wp-content/uploads/2025/01/H6-EFI-with-cnav.pdf
8	Top Flight Airborg H8 10K	50	1	10	Top Flight
9	Avartek Boxer Hybrid Drone	27	1.2	7	https://avartek.fi/#features
10	Avartek Boxer Hybrid Drone	25	1.5	5	https://avartek.fi/#features
11	Harris Aerial Carrier H6 Hybrid	25	1.5	5	https://harrisaerial.com/wp-content/uploads/2025/01/H6-EFI-with-cnav.pdf
12	Parallel Flight Firefly	54.4	1.6	45	Parallel Flight https://dronedj.com/2022/01/04/firefly-really-heavy-lift-drone-boasts-mega-endurance-too/#:~:text=For%20starters%2C%20it%20weighs%20in%20at%20120%20lbs.
13	Avartek Boxer Hybrid Drone	27	1.75	6	https://avartek.fi/#features
14	Quaternium HYBRiX 20	20	2	2	https://content.ilabsolutions.com/wp-content/uploads/2019/10/Quaternium-Hybrix.20-Technical-Datasheet.pdf
15	Skyfront Perimeter 8+	26	2	7.5	Skyfront
16	YANGDA YD6-1600L Hybrid Hex	31.6	2	5	https://www.yangdaonline.com/yangda-yd6-1600l-gas-electric-hybrid-hexacopter/#:~:text=payload
17	Top Flight Airborg H8 10K	50	2	4	Top Flight
18	THEA HEX	22	2	5	https://www.foxtechfpv.com/thea-hex-hybrid-industrial-drone.html#yt_tab_products1/
19	Avartek Boxer Hybrid Drone	25	2.2	4	https://avartek.fi/#features
20	Avartek Boxer Hybrid Drone	27	2.4	5	https://avartek.fi/#features
21	Foxtech Thor 210 Hybrid Hex	56	2.5	10	https://manuals.plus/tag/thor-210-hybrid-hexacopter#:~:text=user%20manual,all%20of%20your%20professional%20needs
22	Avartek Boxer Hybrid Drone	25	2.91667	3	https://avartek.fi/#features
23	Skyfront Perimeter 8+	26	3	5	Skyfront
24	Avartek Boxer Hybrid Drone	27	3.08333	4	https://avartek.fi/#features
25	AAC HYBRID ADVANCED MULTI-ROTOR (HAMR)	18.15	3.5	0	https://www.pegasusaero.ca/new-page-1
26	AAC HAMR (Hybrid Advanced MR)	18	3.5	2.7	Advanced Aircraft Co.
27	Foxtech Gaia 160 Elite Pro	19.7	3.5	0	https://www.foxtechfpv.com/gaia-160-elite-pro-2400w-hybrid-drone.html?srsltid=AfmBOorTr3mrmaqRXBhHhMm-7AY8k72Mhc7VlYU9GfFNZ8FWjal07te6
28	Avartek Boxer Hybrid Drone	25	3.75	2	https://avartek.fi/#features
29	Avartek Boxer Hybrid Drone	27	3.83333	3	https://avartek.fi/#features
30	Avartek Boxer Hybrid Drone	27	4.5	2	https://avartek.fi/#features
31	Avartek Boxer Hybrid Drone	25	4.83333	1	https://avartek.fi/#features
32	Pegasus Aeronautics G15 SENTINEL	25	5	0	https://www.pegasusaero.ca/g15-sentinel
33	Skyfront Perimeter 8+	26	5	0	Skyfront
34	Aerodimension ZEUS OCTO 8	22.7	5	0	Aerodimension
35	Avartek Boxer Hybrid Drone	27	5.25	1	https://avartek.fi/#features
36	Harris Aerial Carrier H6 Hybrid	25	6	0	https://harrisaerial.com/wp-content/uploads/2025/01/H6-EFI-with-cnav.pdf
37	THEA HEX	22	6	1	https://www.foxtechfpv.com/thea-hex-hybrid-industrial-drone.html#yt_tab_products1/
38	THEA HEX	22	7	0	https://www.foxtechfpv.com/thea-hex-hybrid-industrial-drone.html#yt_tab_products1/
39	Quaternium HYBRiX 2.1	25	8.16	0	https://www.gpsworld.com/hybrix-multirotor-uav-flies-non-stop-for-8-hours/
